# Supplementary material for: Morphological Evolvement of Carbon Nanotubes Synthesized by Using Conducting Polymer Nanofibers
Source: Hindawi journal article supplement (doi:10.1155/2020/4953652), 2020-03-02
Supplement: f1 [file 4953652.f1.docx]

***Supporting Information for “Morphological evolvement of carbon nanotubes synthesized by using conducting polymer nanofibers: a mechanistic study”***

Yang Liu,* John H. Xin, Xinyu Zhang and Chao Zhang


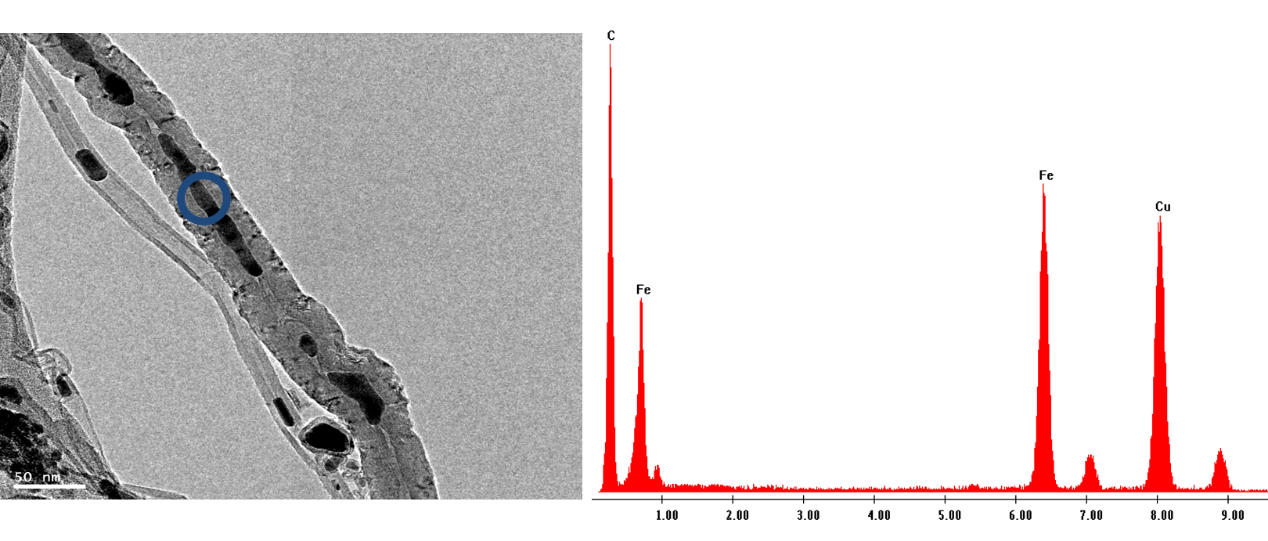


**Figure S1.** EDX spectrum of the catalyst nanoparticle observed inside the core of the as-obtained CNTs, the elemental composition of the nanoparticle was identified to be Fe.


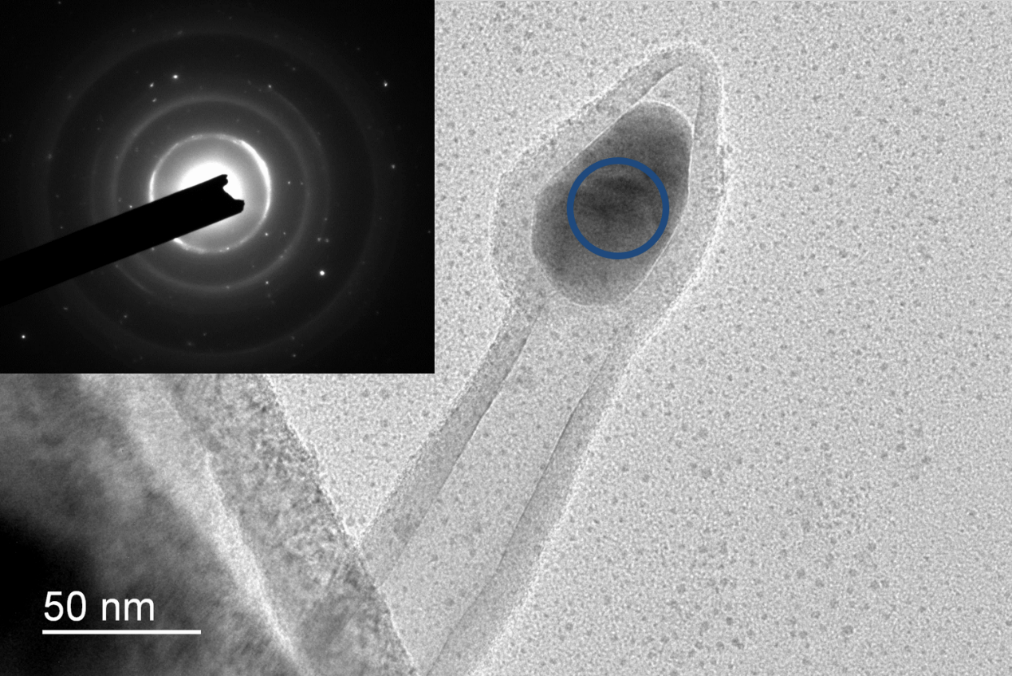


**Figure S2.** SAED pattern of a catalyst Fe NP encapsulated at the tip of a CNT. The interpretation of pattern indicated the NP was polycrystalline.


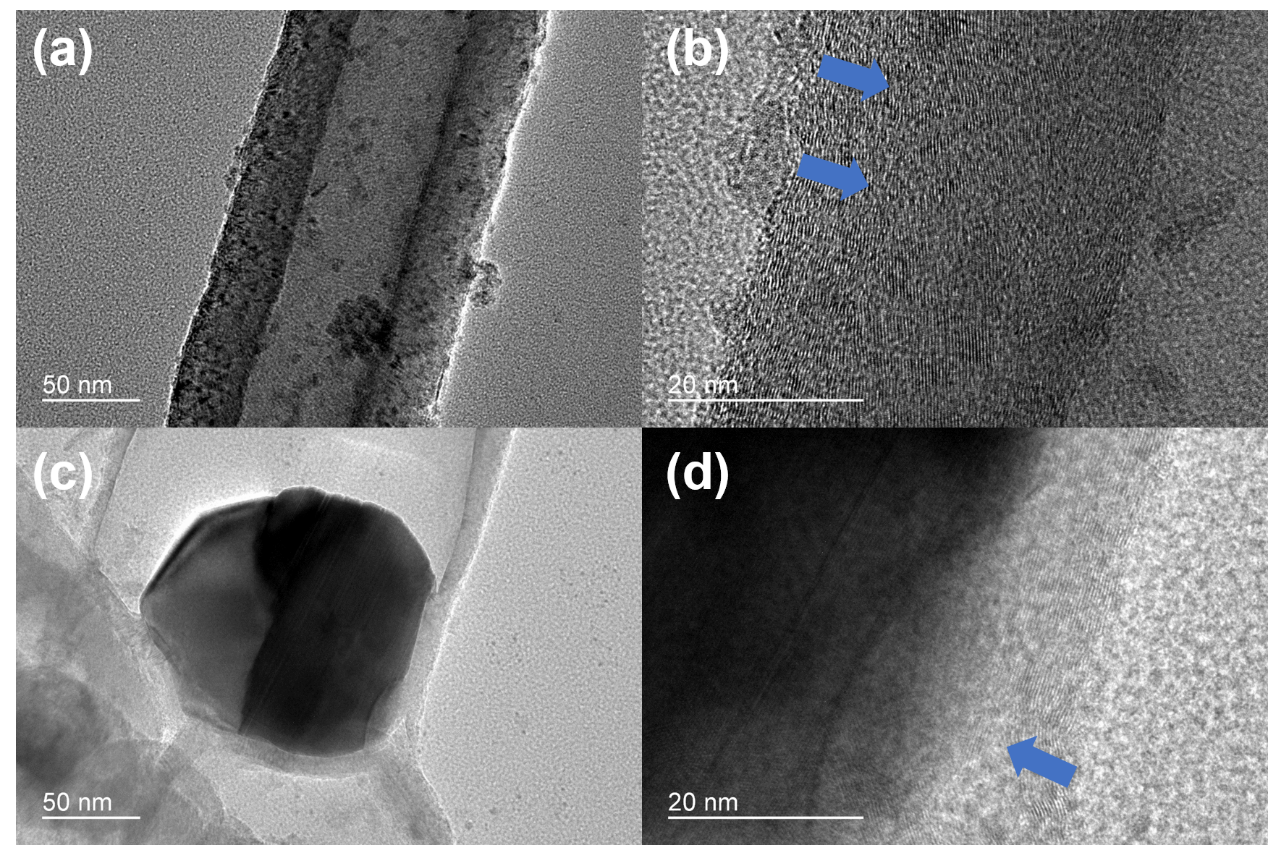


**Figure S3.** (a, c) TEM and (b, d) HRTEM images of the CNTs synthesized by 30 s microwave time. The representative stacking faults are marked with blue arrows.


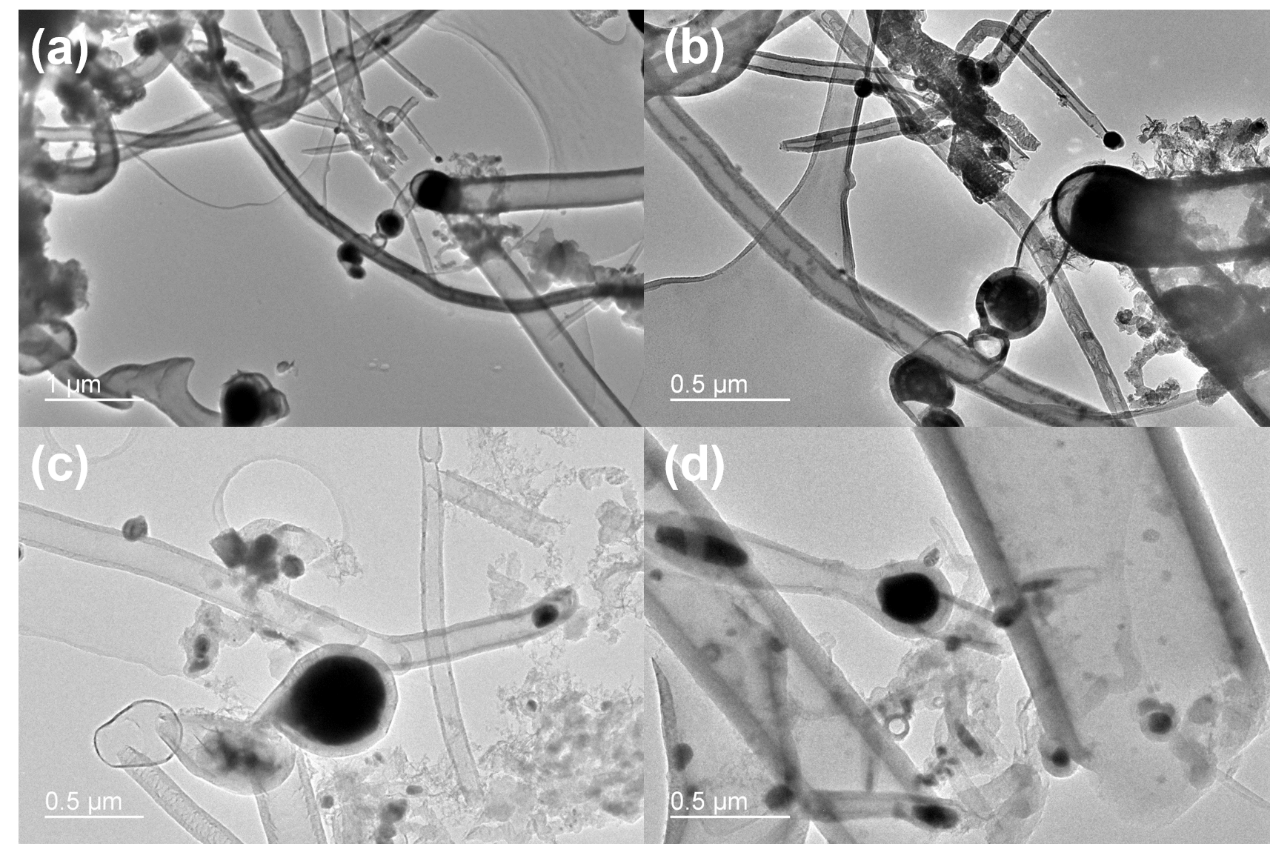


**Figure S4.** (a-d) TEM images of the CNTs with smooth and continuous tube walls synthesized by 60 s microwave time.


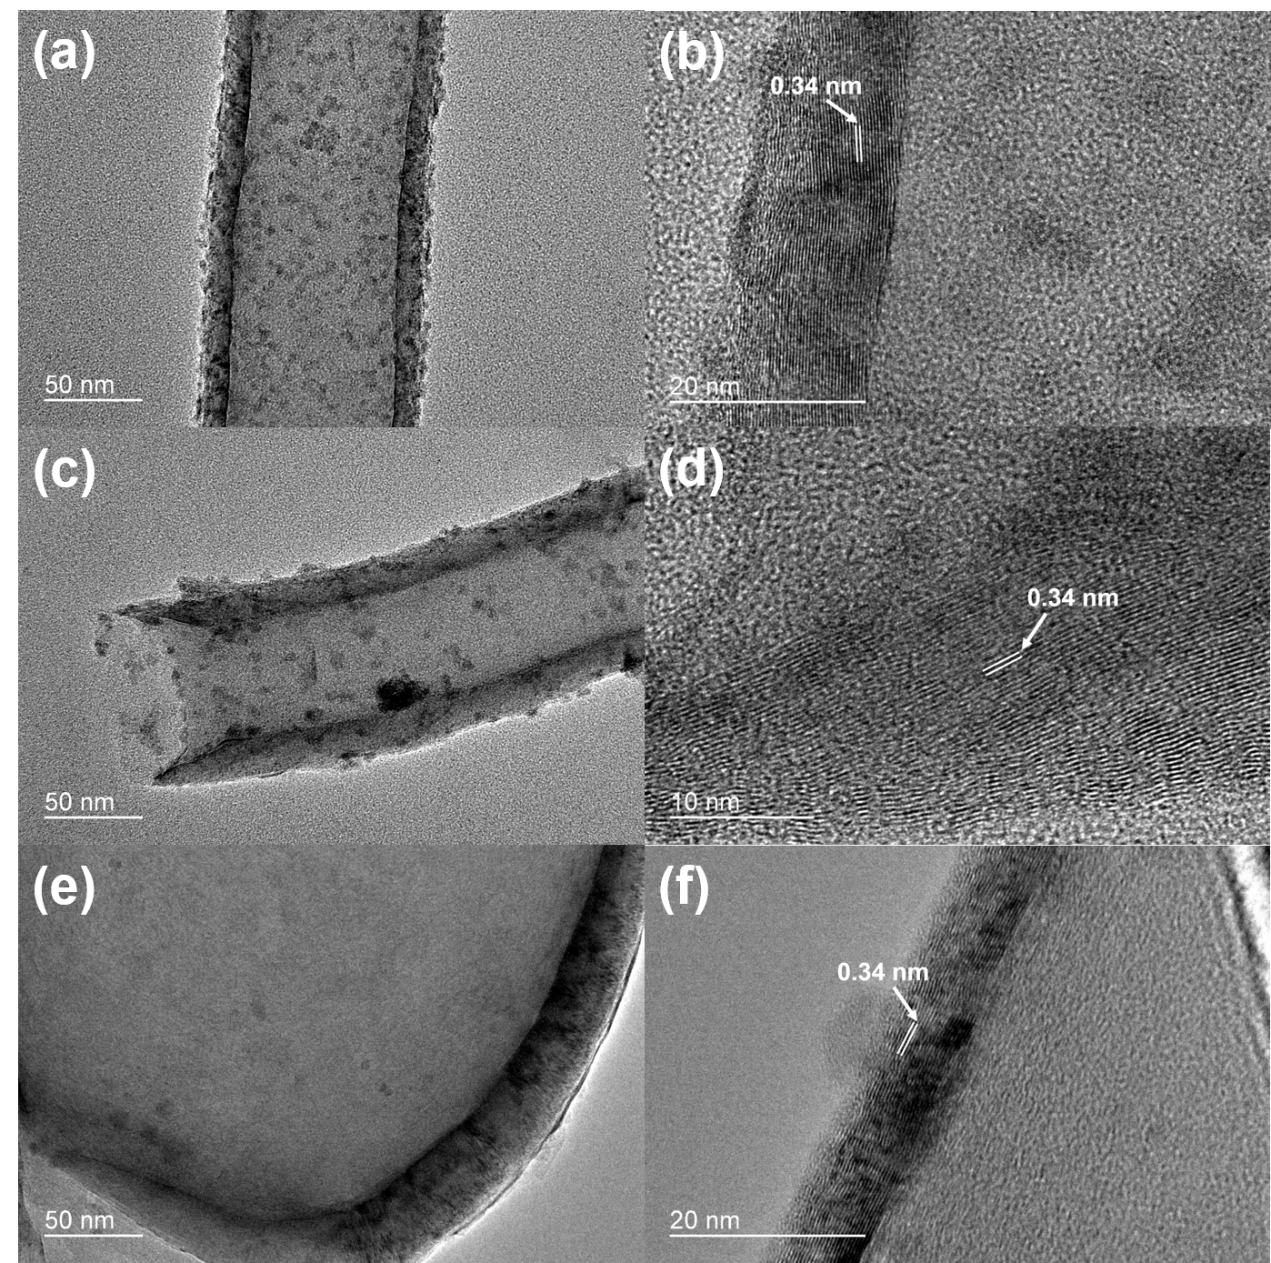


**Figure S5.** (a, c, e) TEM and (b, d, f) HRTEM images of the CNTs synthesized by 60 s microwave time. A lattice spacing of 0.34 nm can be observed for the graphitic tube walls.


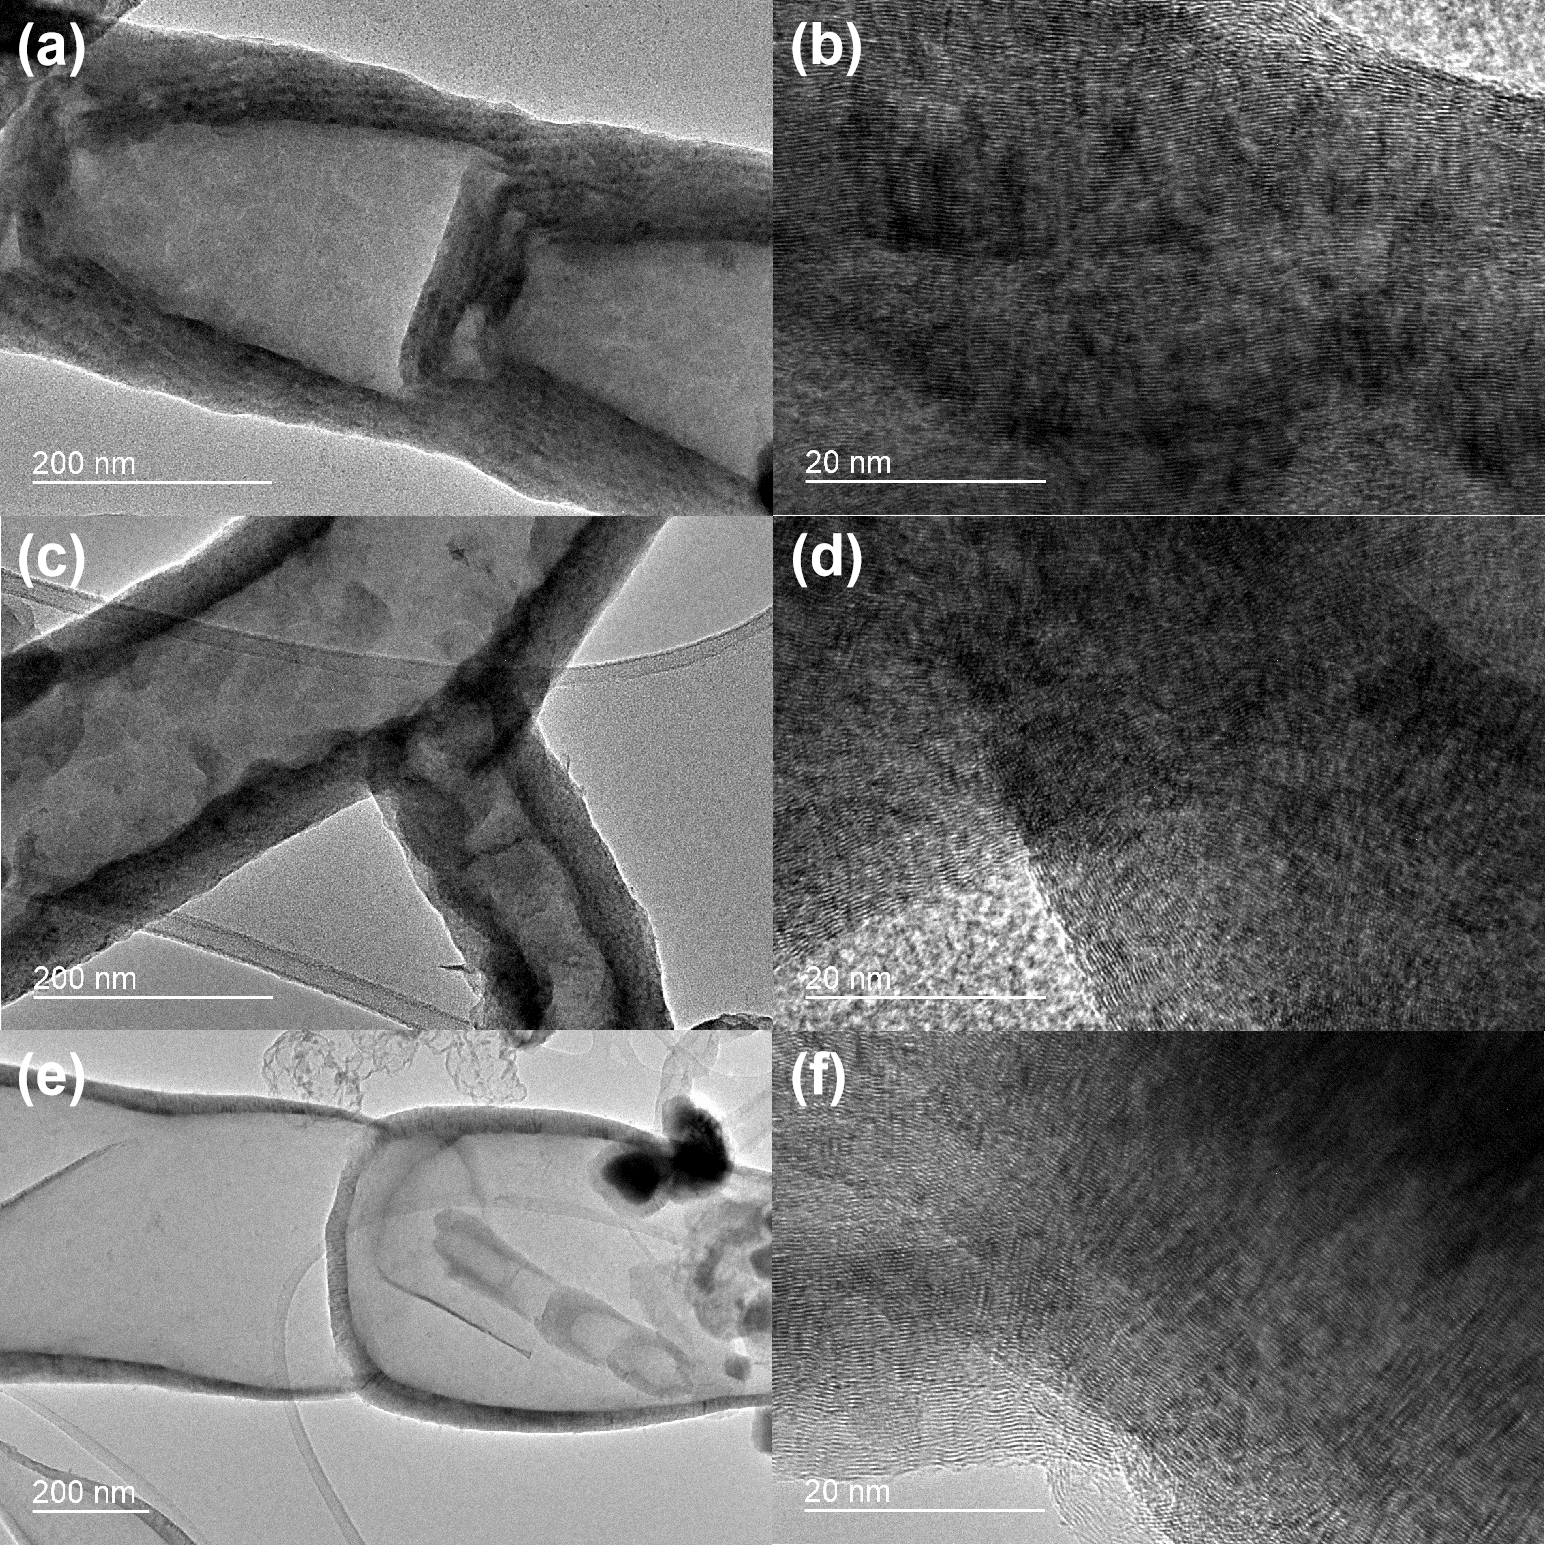


**Figure S6.** (a, c, e) TEM and the corresponding (b, d, f) HRTEM images of the CNTs synthesized by 120 s microwave time.





**Figure S7.** HRTEM image of a Fe catalyst nanoparticle encapsulated by graphitic shells.
